# Supplementary material for: GATA3 expression correlates with poor prognosis and tumor-associated macrophage infiltration in peripheral T cell lymphoma
Source: PubMed Central journal article supplement (PMC5323155; doi:10.18632/oncotarget.11673), 2016-08-29
Supplement: oncotarget-07-65284-s001.pdf [file oncotarget-07-65284-s001.pdf]

## GATA3 expression correlates with poor prognosis and tumor-associated macrophage infiltration in peripheral T cell lymphoma

### Supplementary Materials

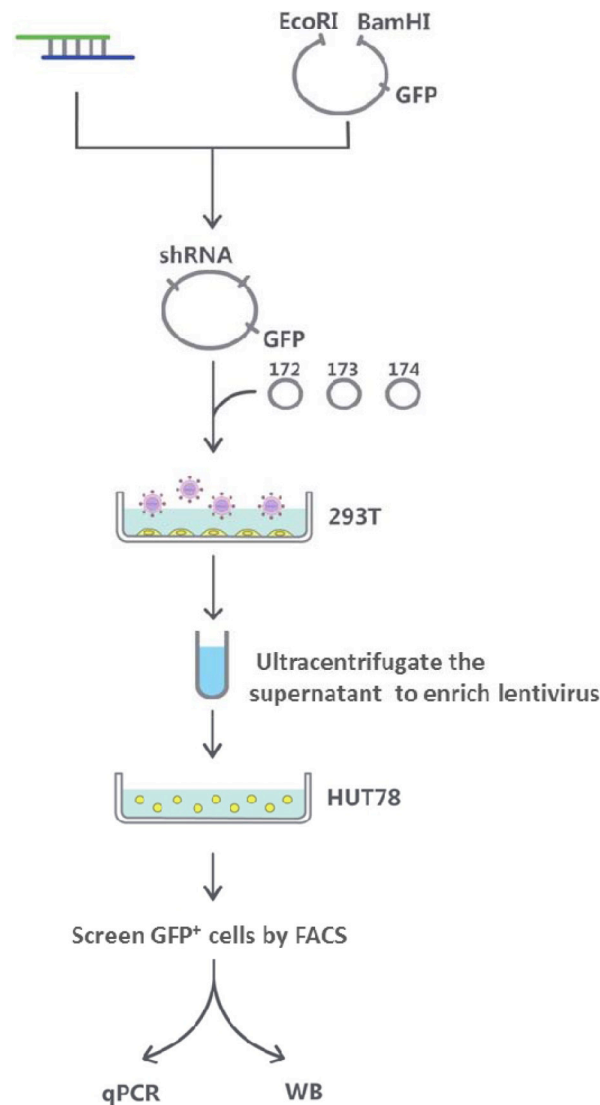

**Supplementary Figure S1: The procedure of constructing GATA3-knockdown Hut78 cell line.** GATA3 shRNA was cloned into pSIH-H1-copGFP shRNA cloning and expression lentivectors from SBI (System Biosciences, USA). Lentivirus was packaged by 293T cells and used to transfect T cell lymphoma cell lines. The cell lines stably expressing short hairpin RNAs (shRNAs) targeting GATA-3 were purified by GFP selection.

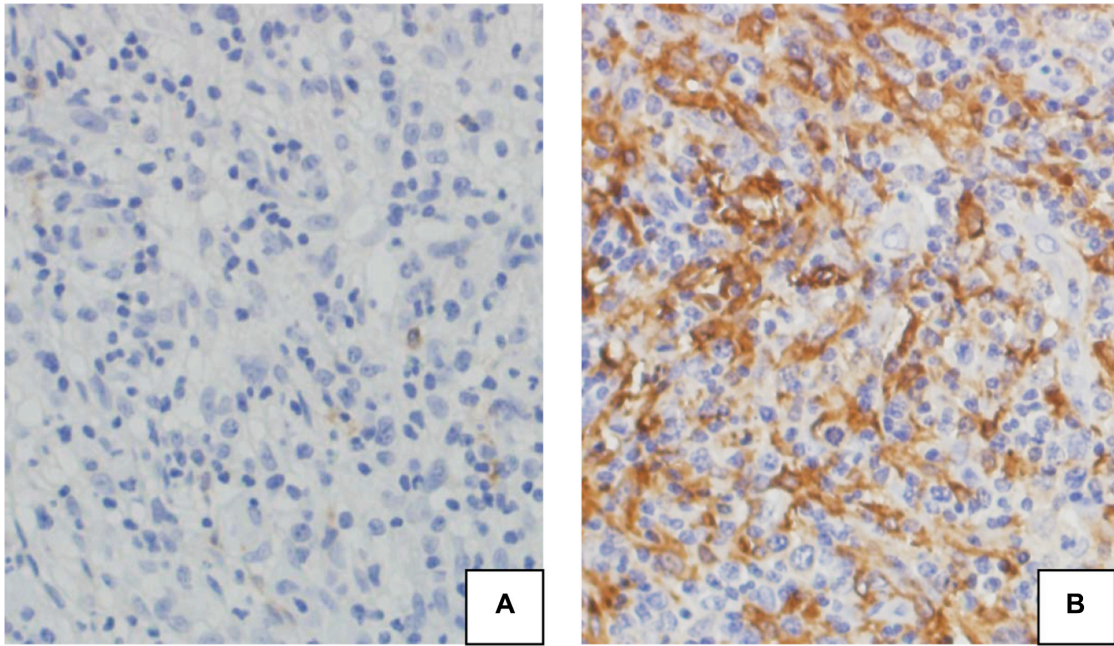

**Supplementary Figure S2: The expression of CD68 in different PTCL tumor tissues.** (A) Negative staining. (B) Positive staining.

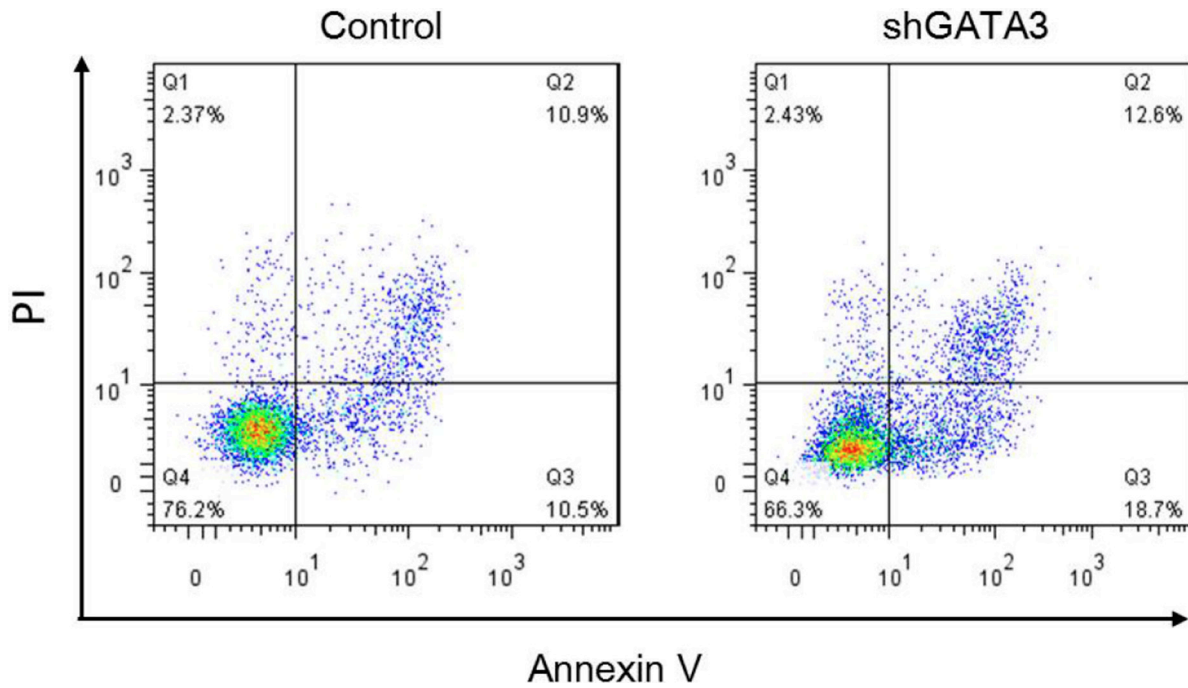

**Supplementary Figure S3: Apoptosis assay by flow cytometry.** Cell viability was measured by flow cytometry using Annexin V and PI staining. We failed to observe prominent differences between GATA3-knockdown Hut78 and control group.

**Supplementary Table S1: Cell line information and sources**

| Cell line        | Histology                                                   | Cell source                                                              | Culture property                           |
|------------------|-------------------------------------------------------------|--------------------------------------------------------------------------|--------------------------------------------|
| <b>HUT78</b>     | CTCL (Sezary Syndrome)                                      | China Infrastructure of Cell Line Resources                              | Suspension growth, partially in aggregates |
| <b>Jurkat</b>    | ATLL (HTLV-1-)                                              | China Infrastructure of Cell Line Resources                              | Suspension growth, in aggregates           |
| <b>Karpas299</b> | PTCL (ALCL, ALK+)                                           | Generous gift from the First Affiliated Hospital of Zhengzhou University | Suspension growth                          |
| <b>U937</b>      | Human histocytic leukemia                                   | China Infrastructure of Cell Line Resources                              | Suspension growth                          |
| <b>293T</b>      | Human renal epithelial cell transfected with adenovirus E1A | China Infrastructure of Cell Line Resources                              | Adherent growth                            |

**Supplementary Table S2: Primer sequences**

| Gene  | Primer sequences 5' → 3'         |
|-------|----------------------------------|
| GATA3 | Forward ACACTCTGGAGGAGGAATGCCAAT |
|       | Reverse TTCGGTTTCTGGTCTGGATGCCTT |
| IL-4  | Forward GGGCTTGAATTCCTGTCCCTGT   |
|       | Reverse TCGTCTTTAGCCTTTCCAAGAAGT |
| IL-5  | Forward AGCTGCCTACGTGTATGCCA     |
|       | Reverse GCAGTGCCAAGGTCTCTTTCA    |
| IL-13 | Forward TCTGCAATGGCAGCATGGTA     |
|       | Reverse GCATCCTCTGGGTCTTCTCG     |
| VEGFa | Forward AGGGCAGAATCATCACGAAGT    |
|       | Reverse AGGGTCTCGATTGGATGGCA     |
| CD206 | Forward CGCTACTAGGCAATGCCAATG    |
|       | Reverse GCAATCTGCGTACCACTTGTTTT  |
| GAPDH | Forward GAAGGTGAAGGTCGGAGTC      |
|       | Reverse GAAGATGGTGATGGGATTTC     |

**Supplementary Table S3: Death causes of 16 patients with OS < 20 days**

| Death cause                                       | Case number |
|---------------------------------------------------|-------------|
| Hemophagocytic syndrome                           | 5           |
| Septic shock, multiple organ dysfunction syndrome | 6           |
| Gastrointestinal bleeding                         | 2           |
| CNS involvement                                   | 1           |
| DIC, major bleeding                               | 1           |
| Multiple organ dysfunction syndrome               | 1           |
